# Supplementary material for: Diversity of fungal feruloyl esterases: updated phylogenetic classification, properties, and industrial applications
Source: Springer Nature journal article supplement (doi:10.1186/s13068-016-0651-6), 2016-10-28
Supplement: MOESM2 [file 13068_2016_651_MOESM2_ESM.pdf]

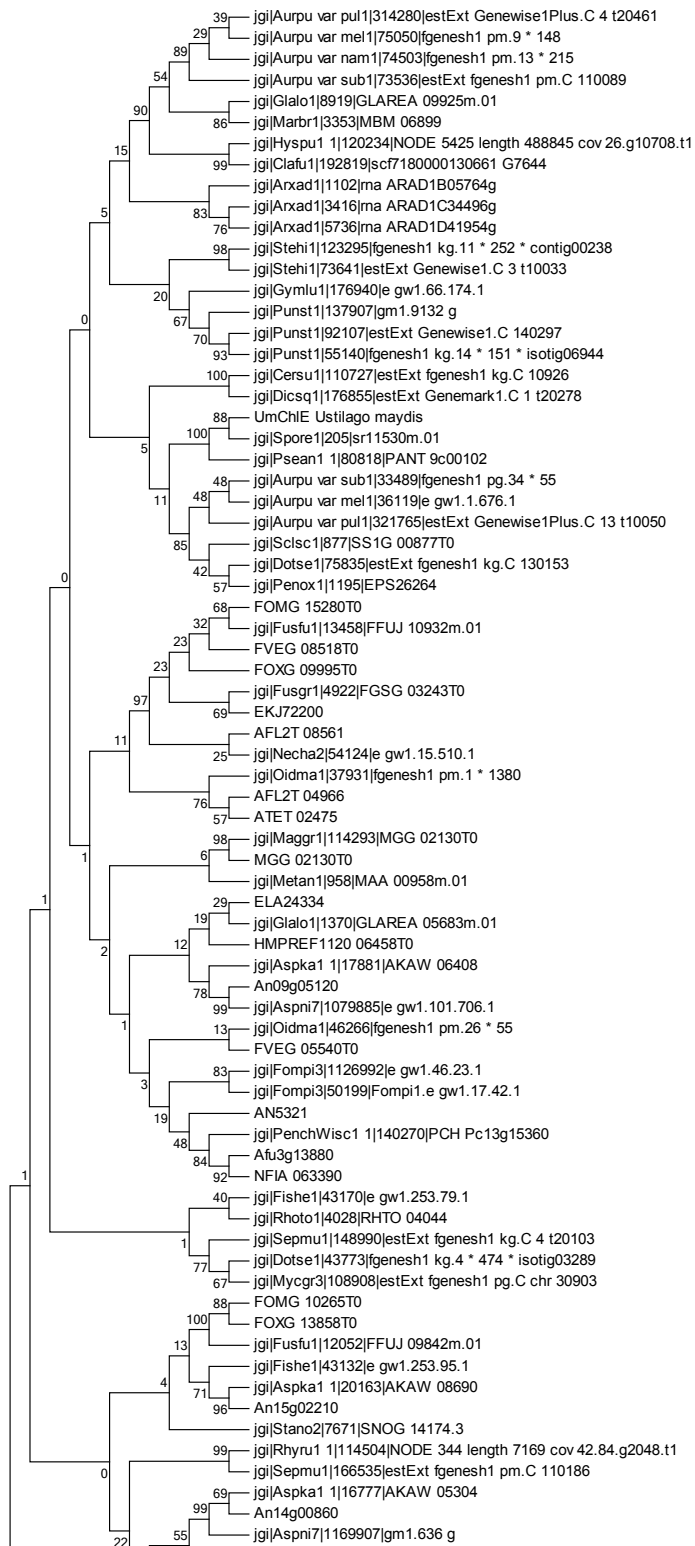

SF13

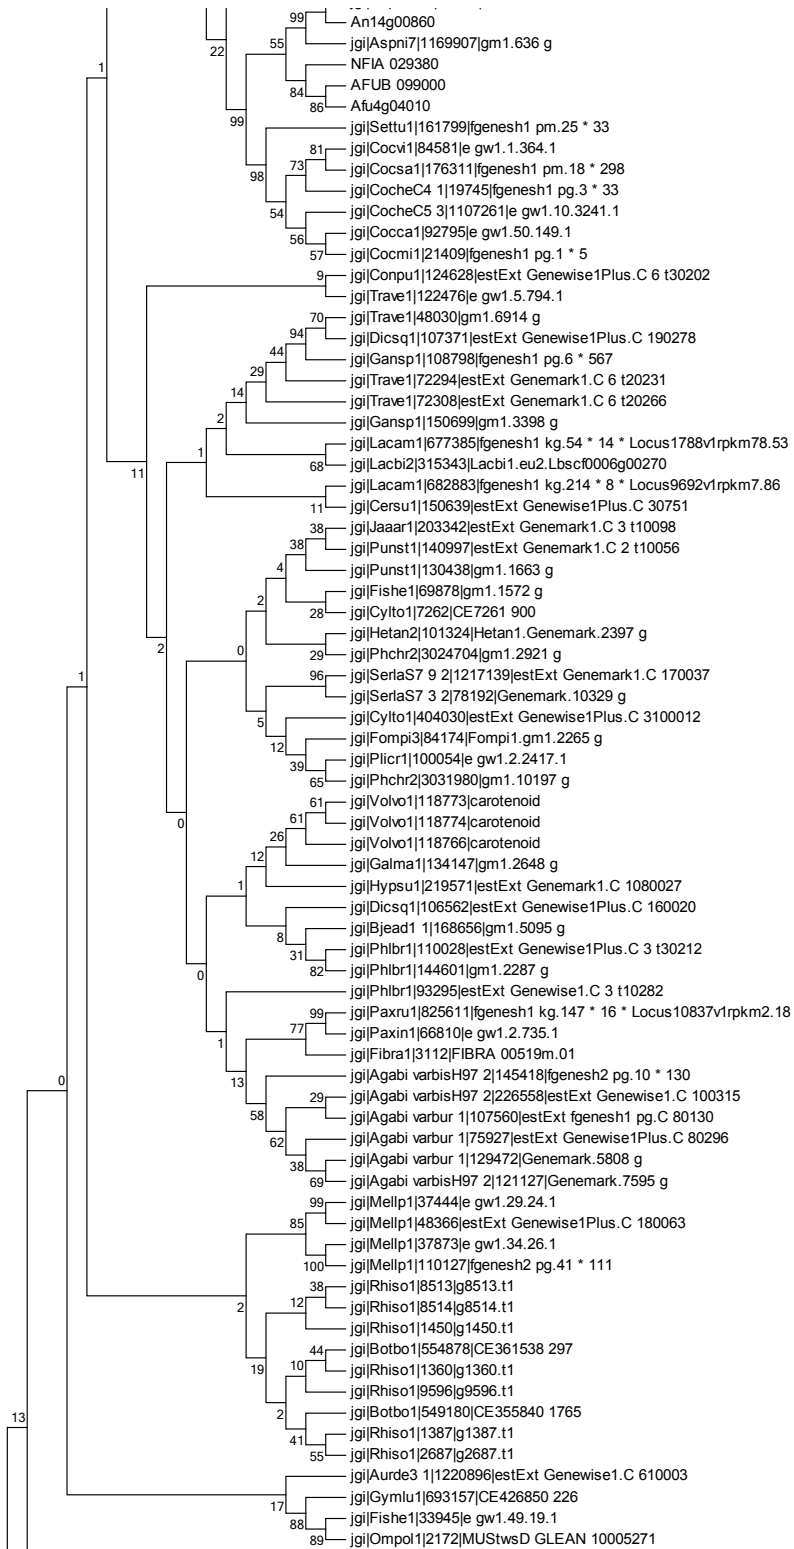

SF13

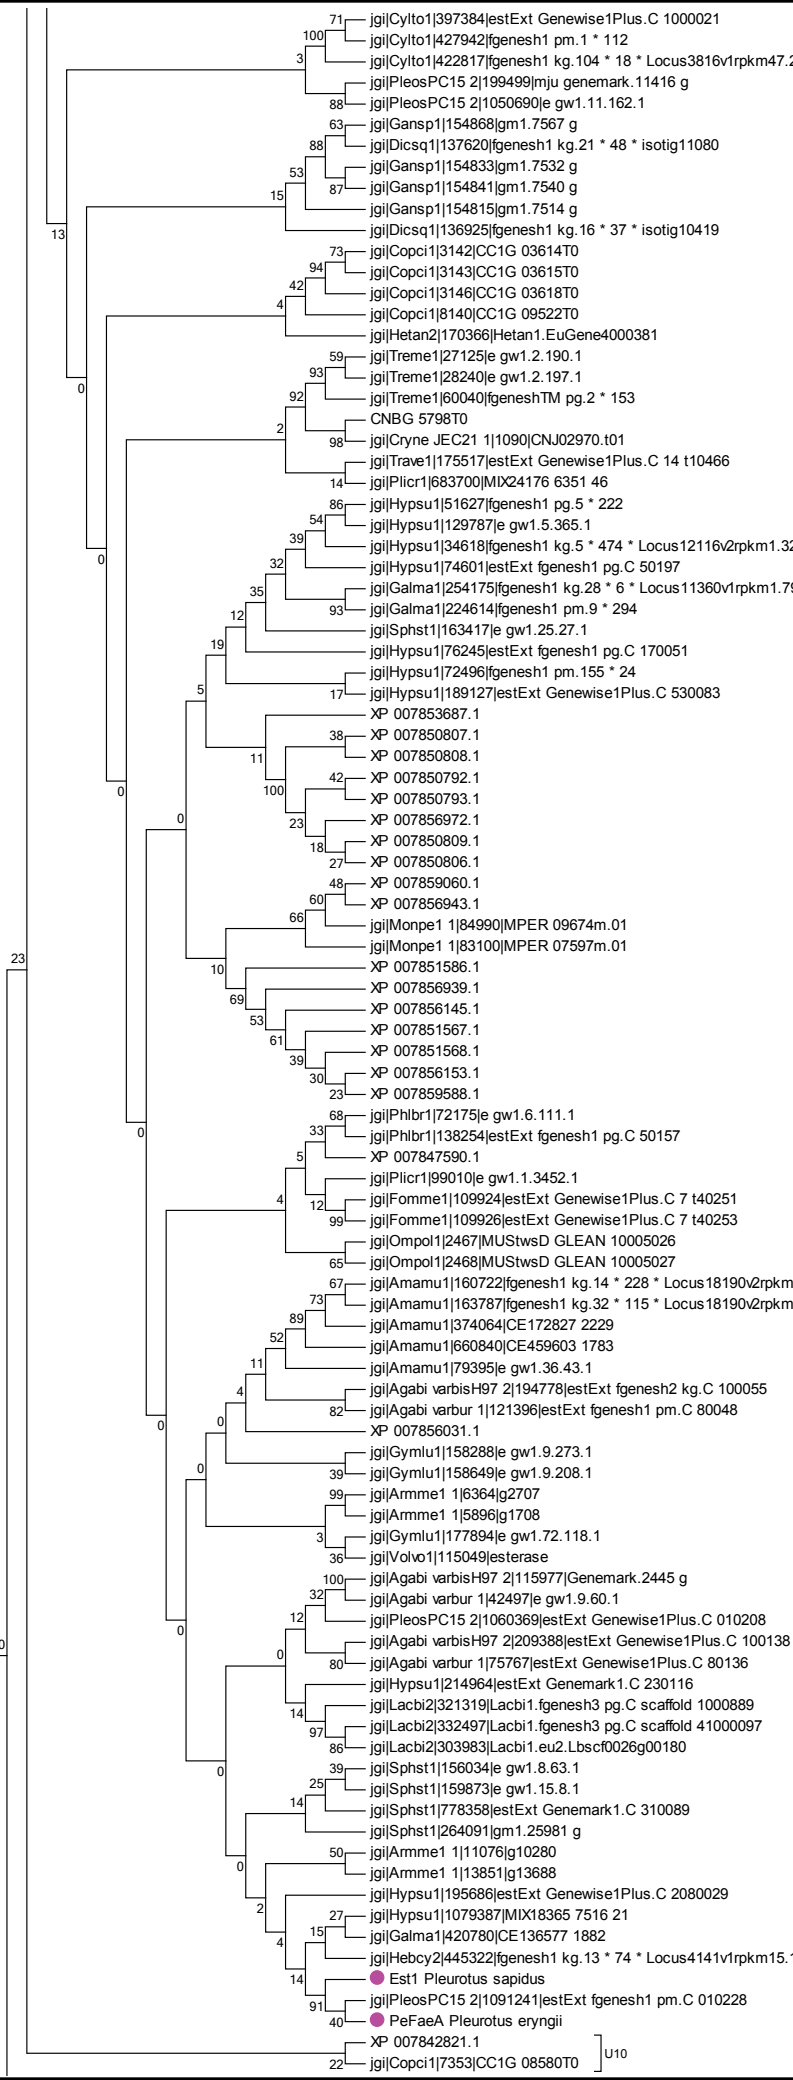

SF12

(SF12, U10)

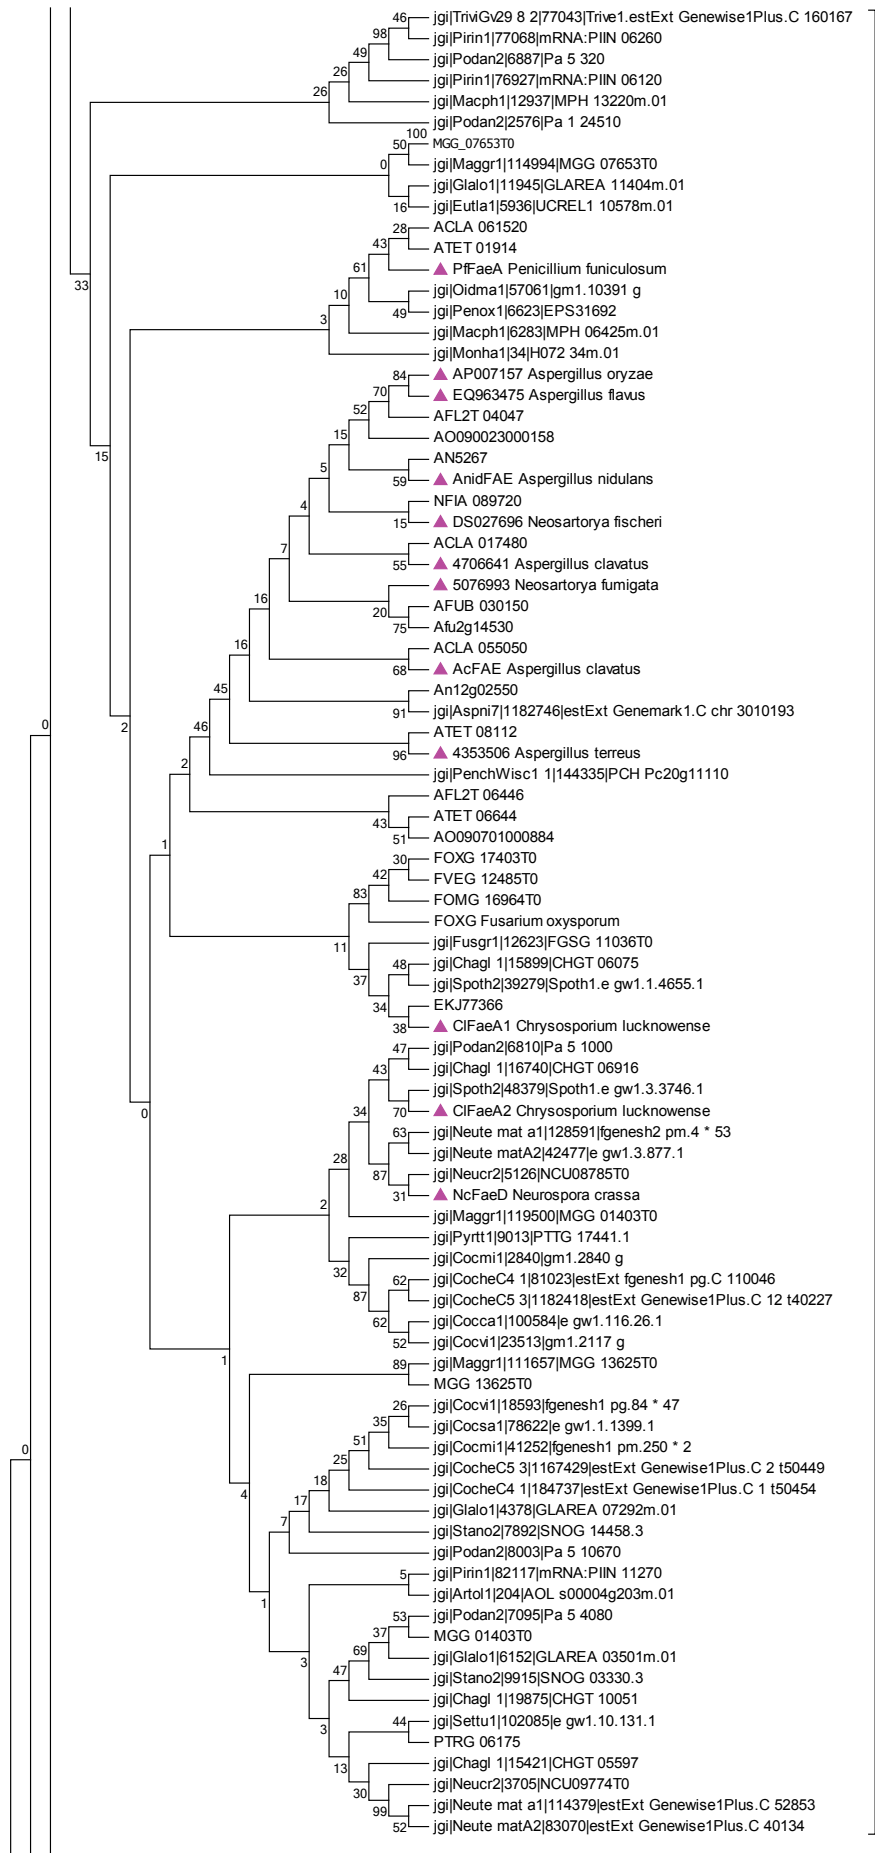

SF5

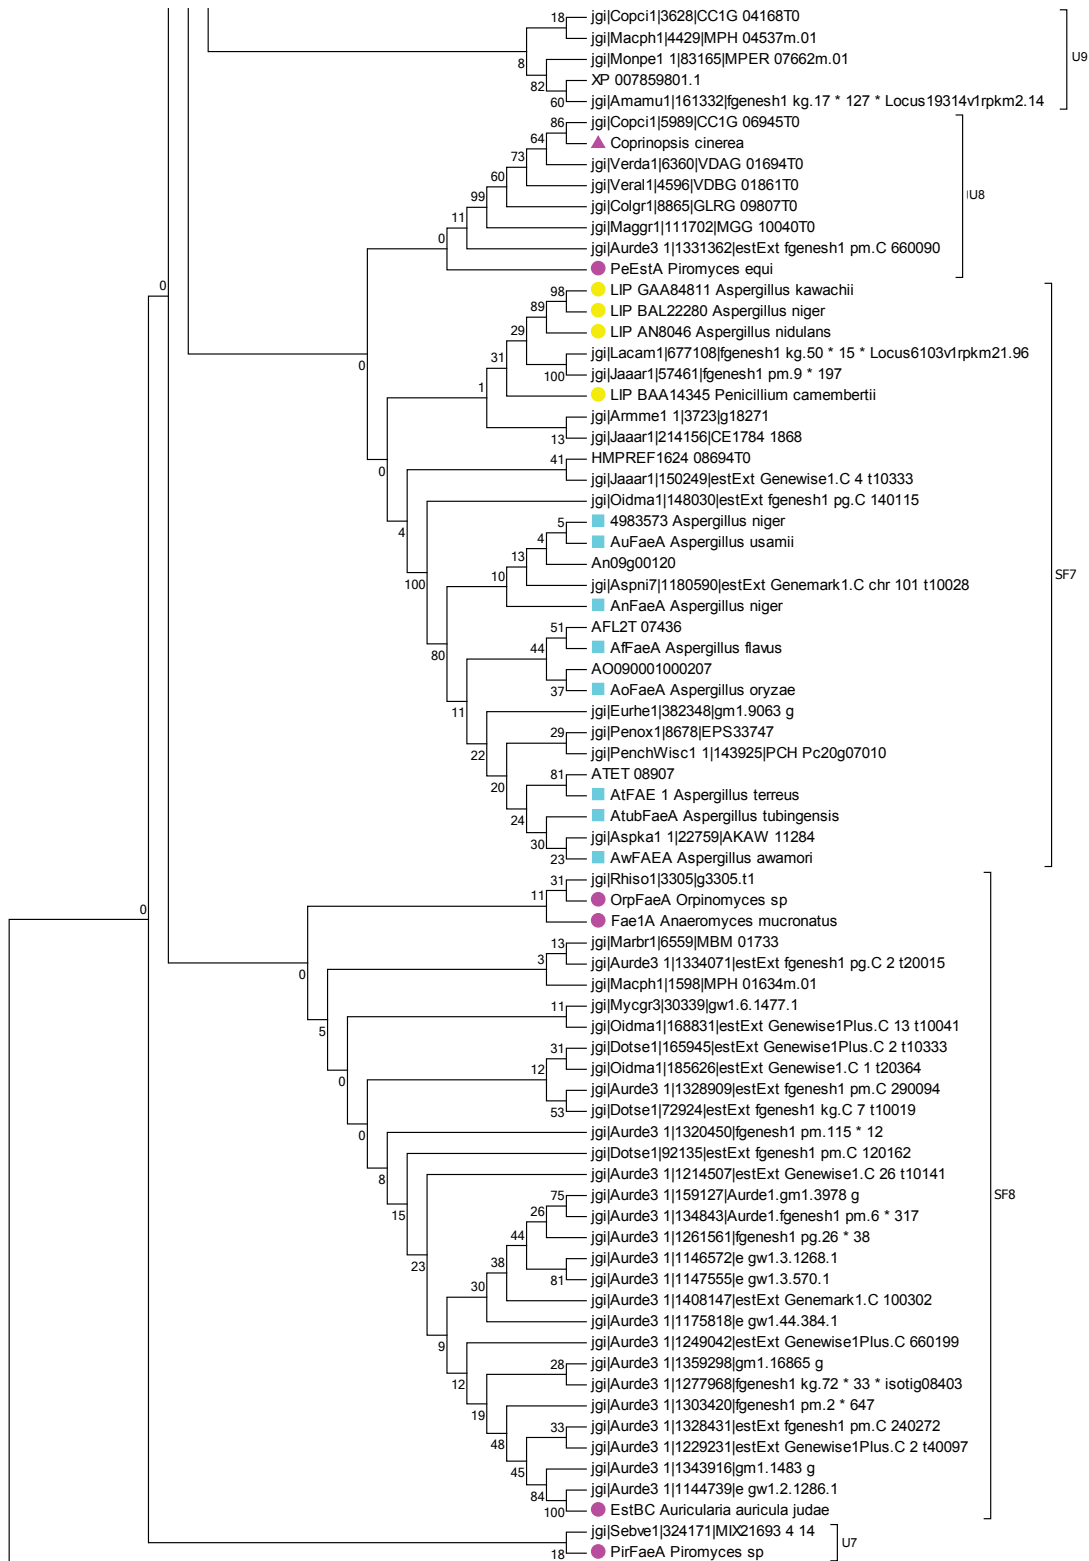

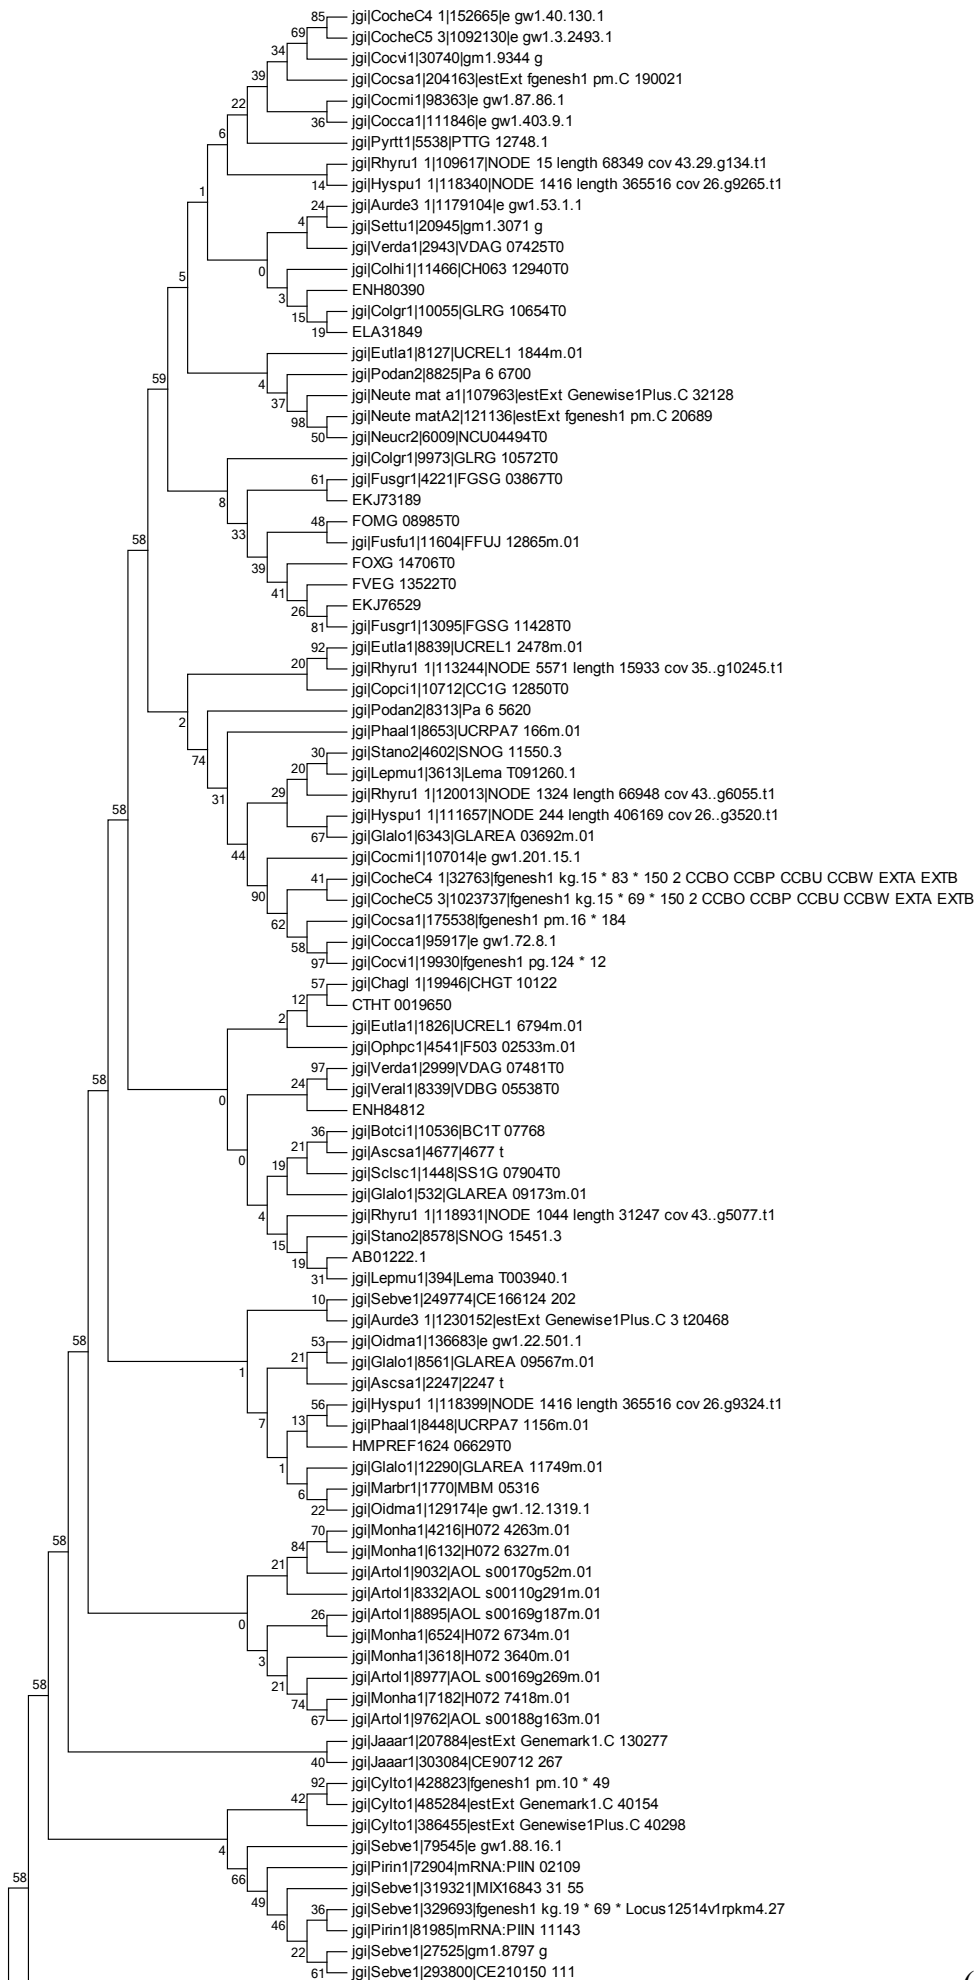

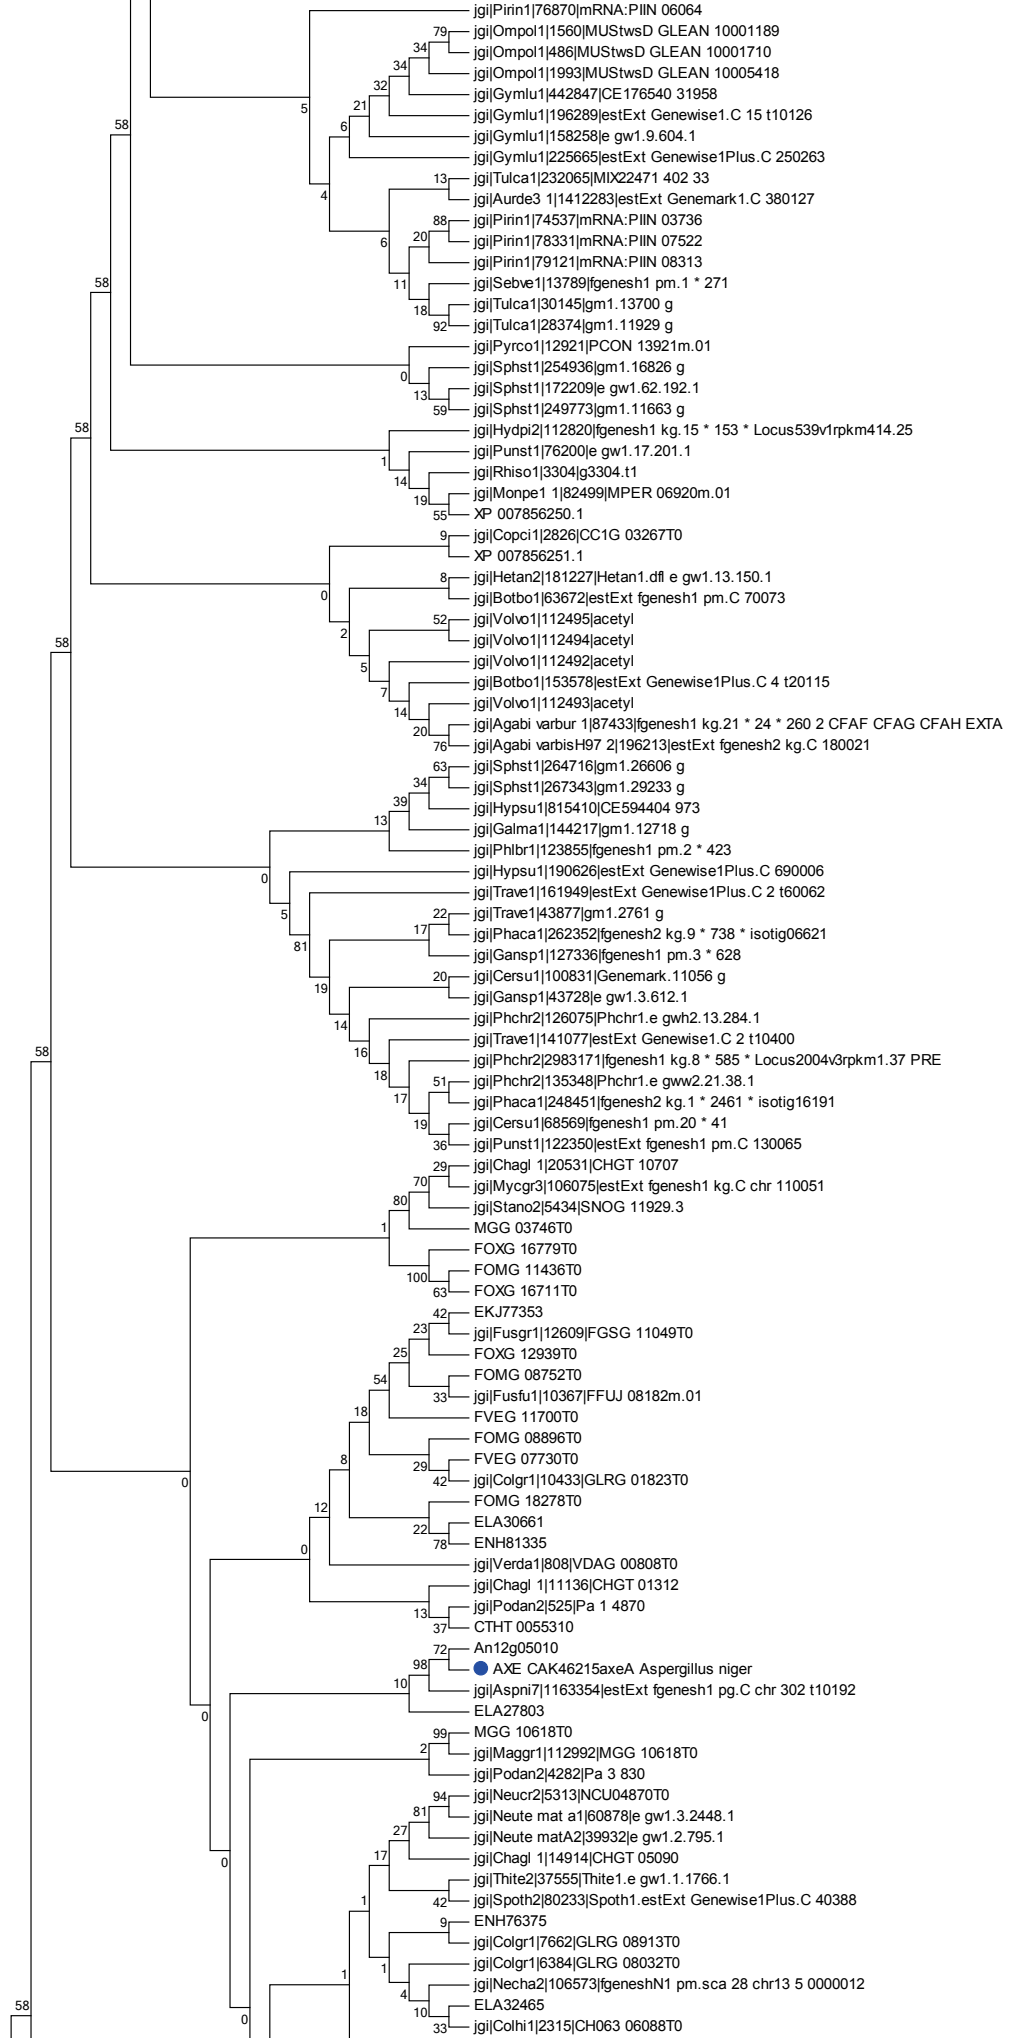

SF6

(SF6)

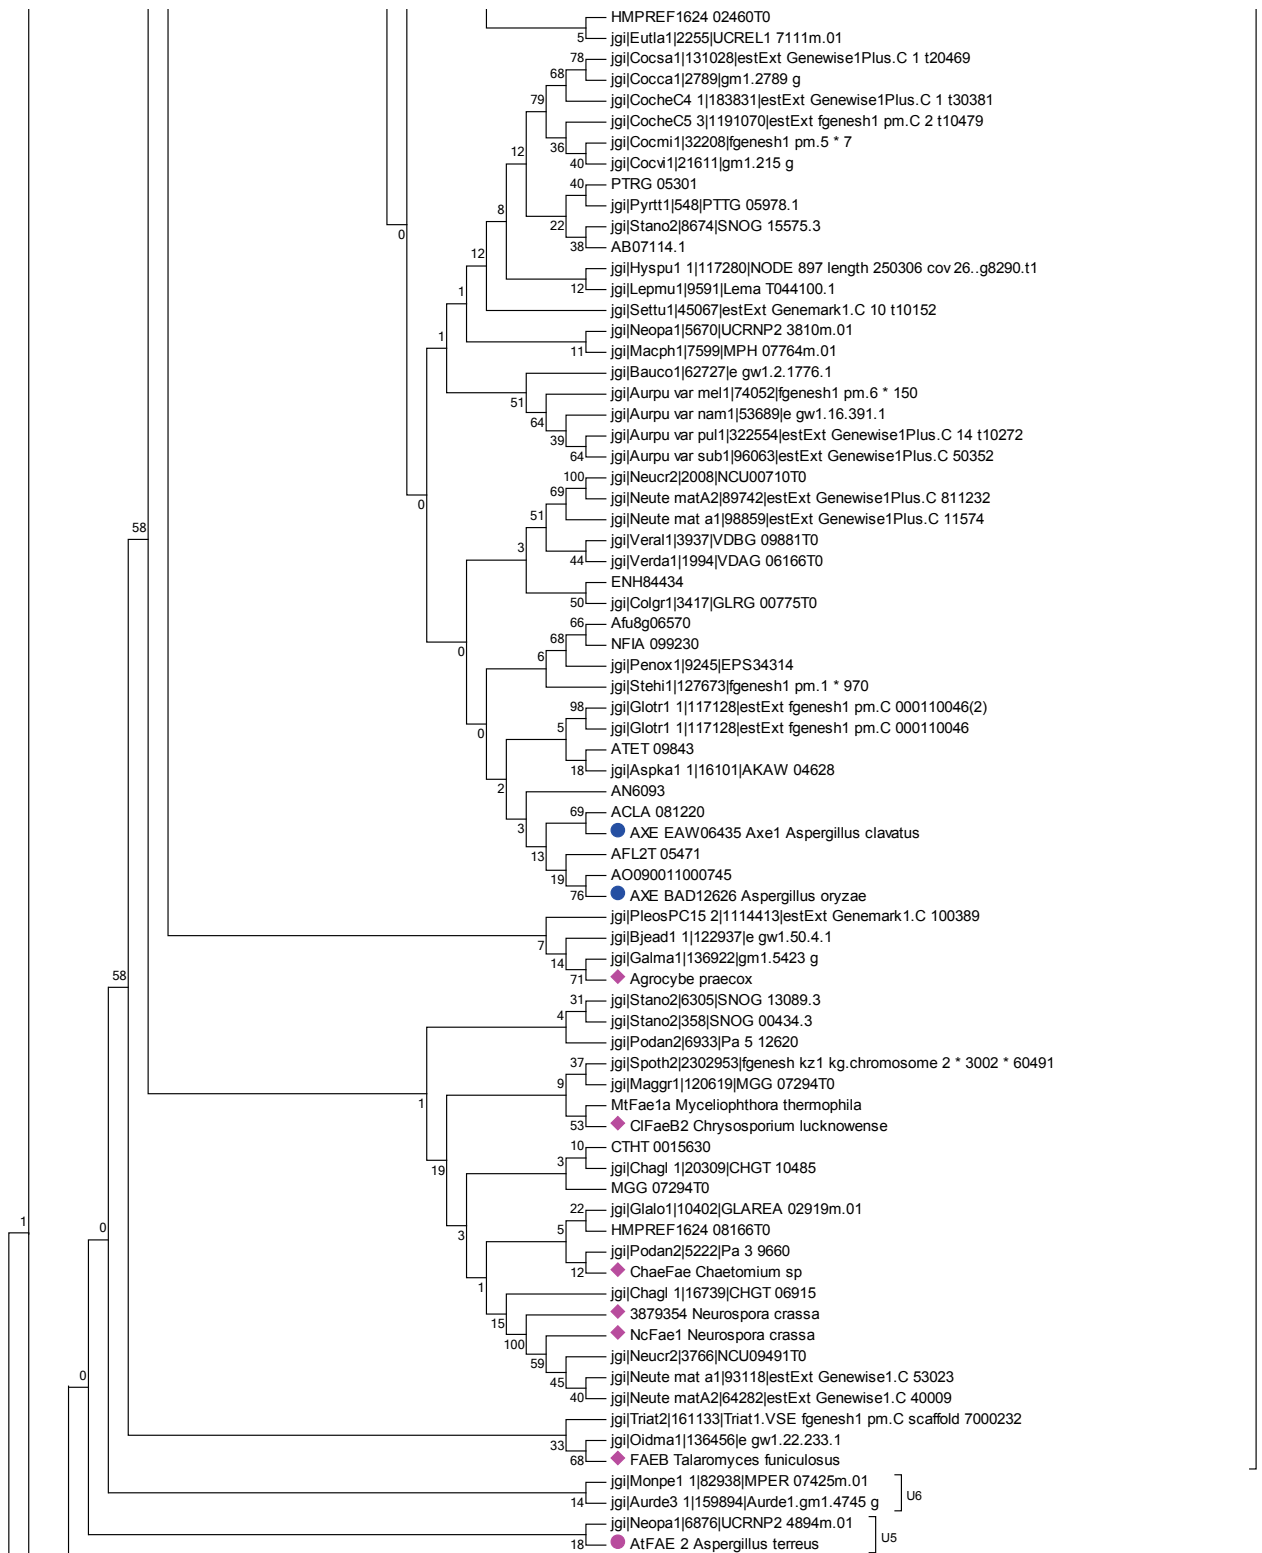



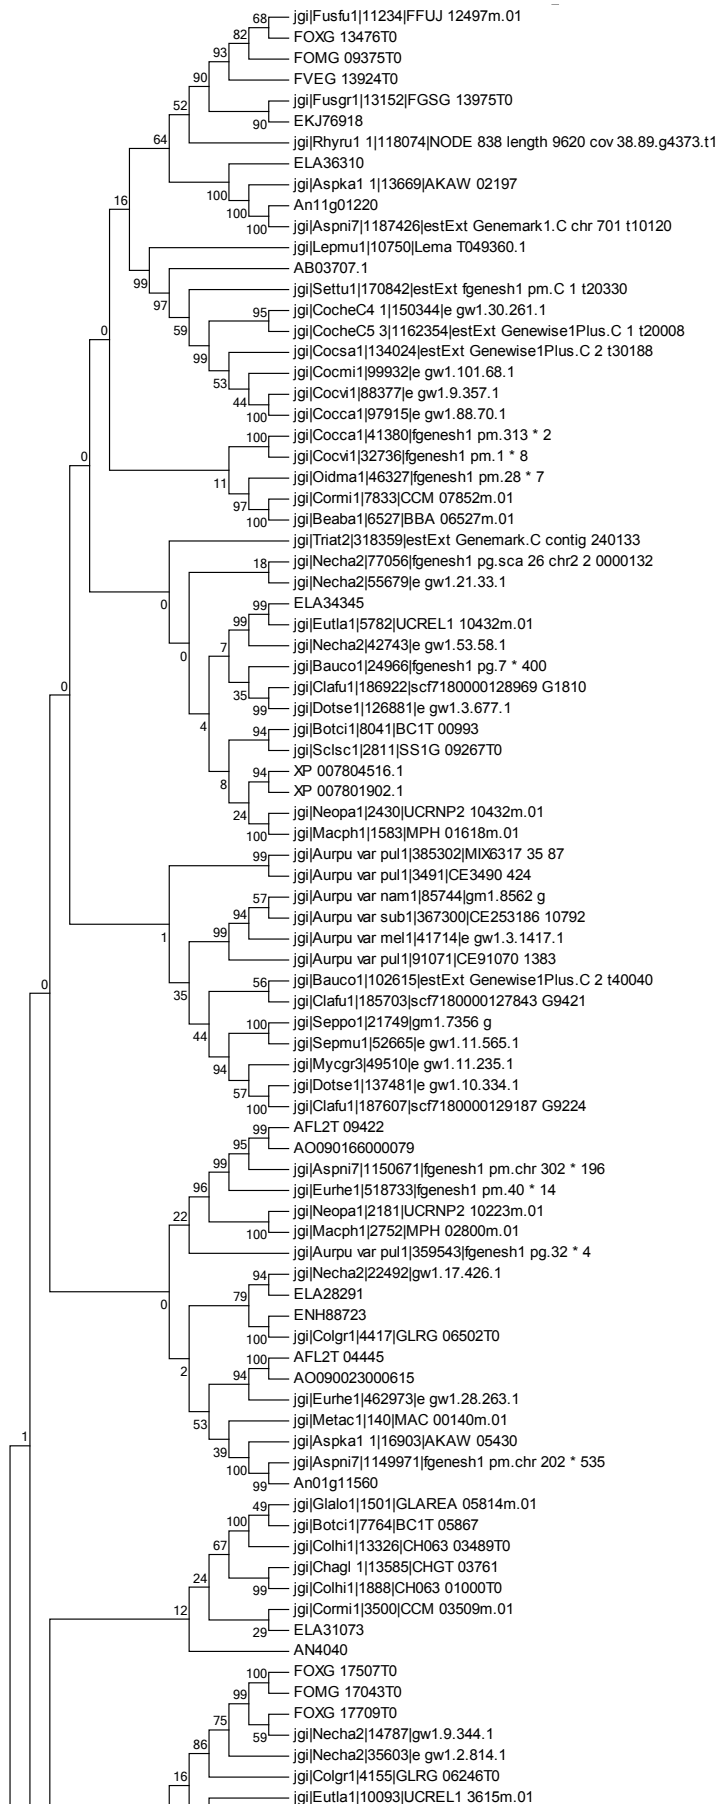

SF10

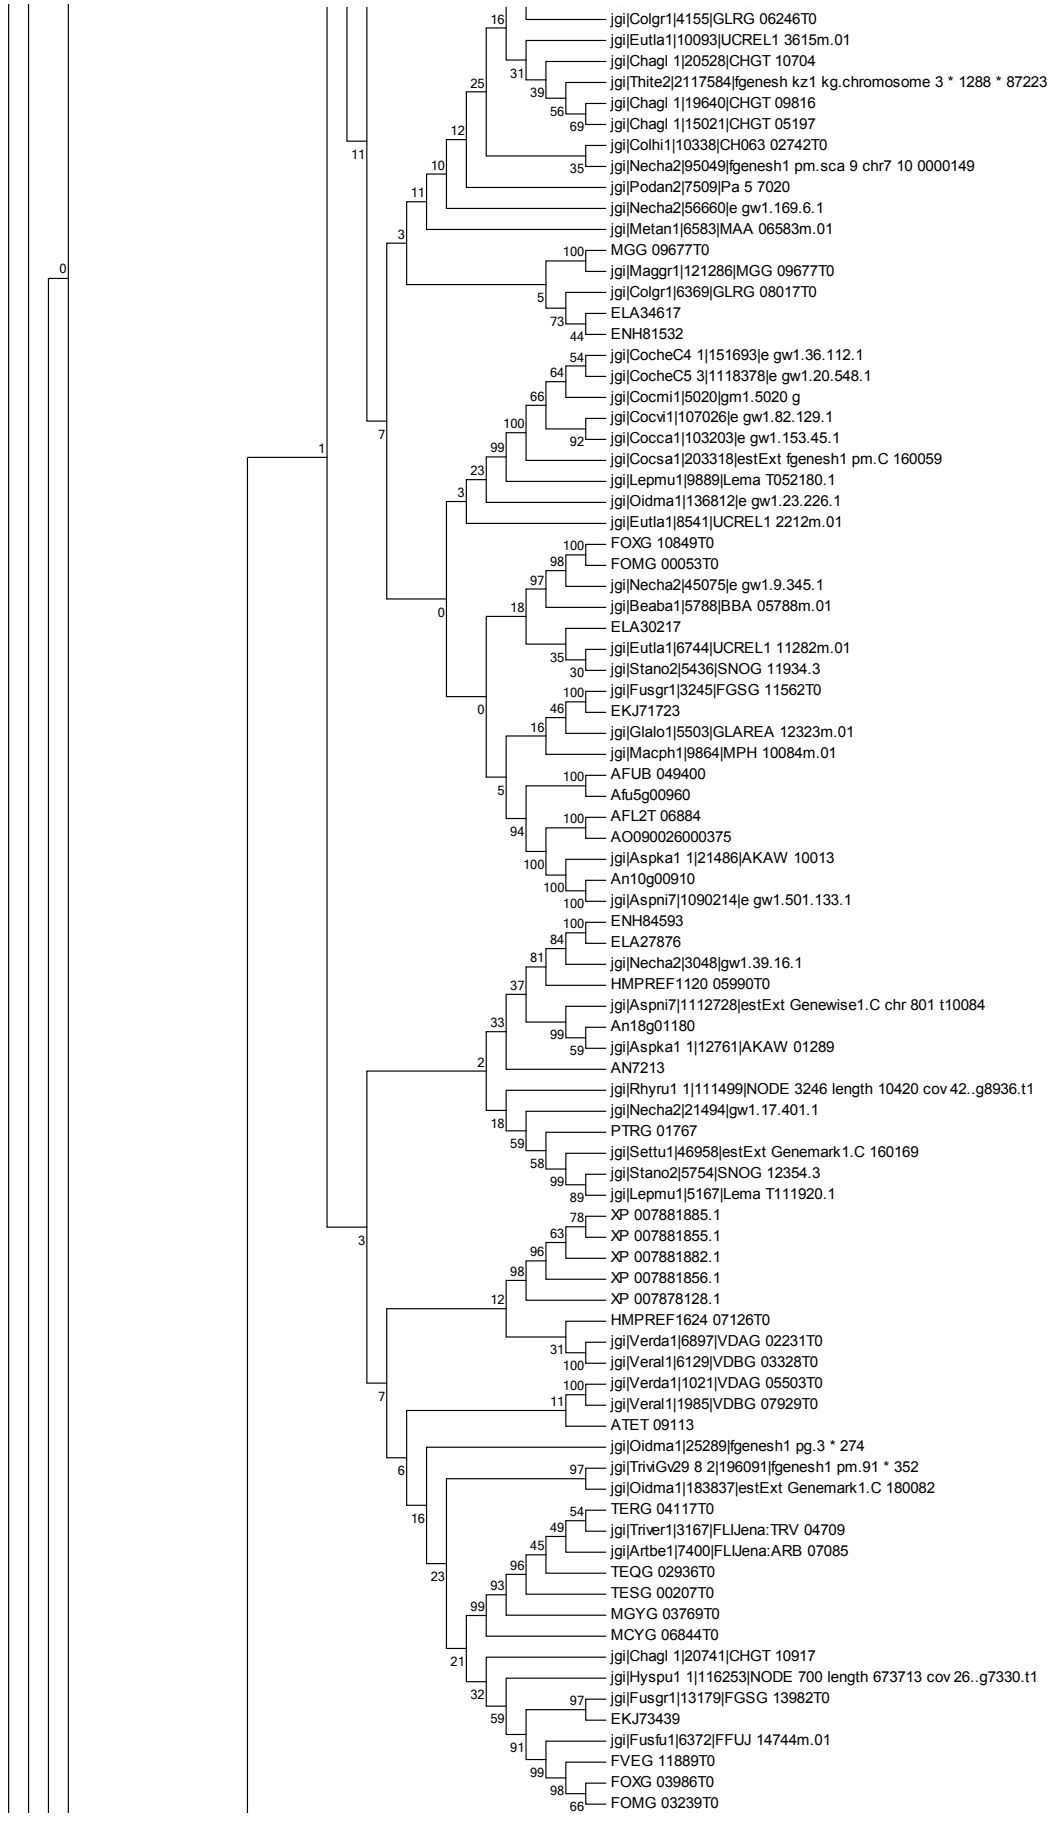

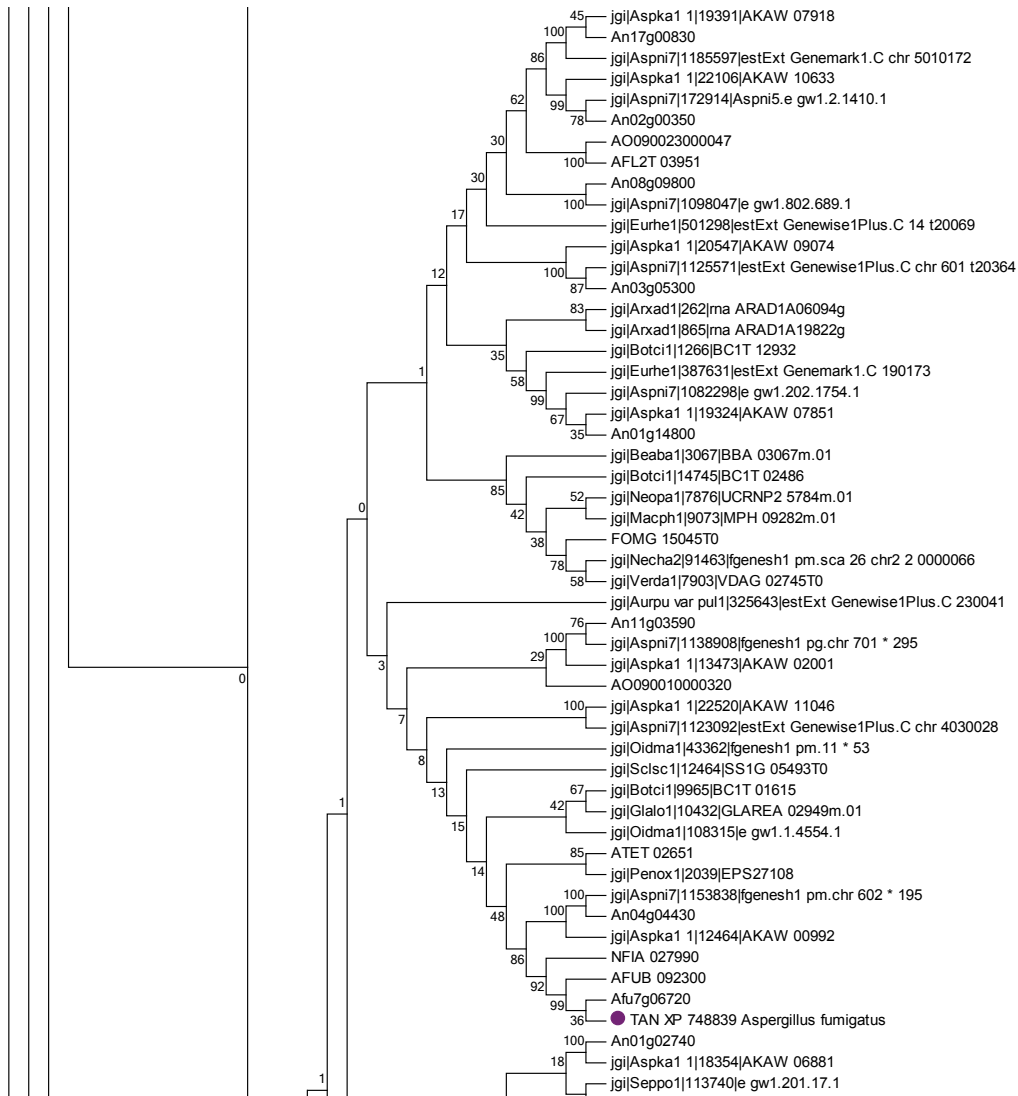

SF11

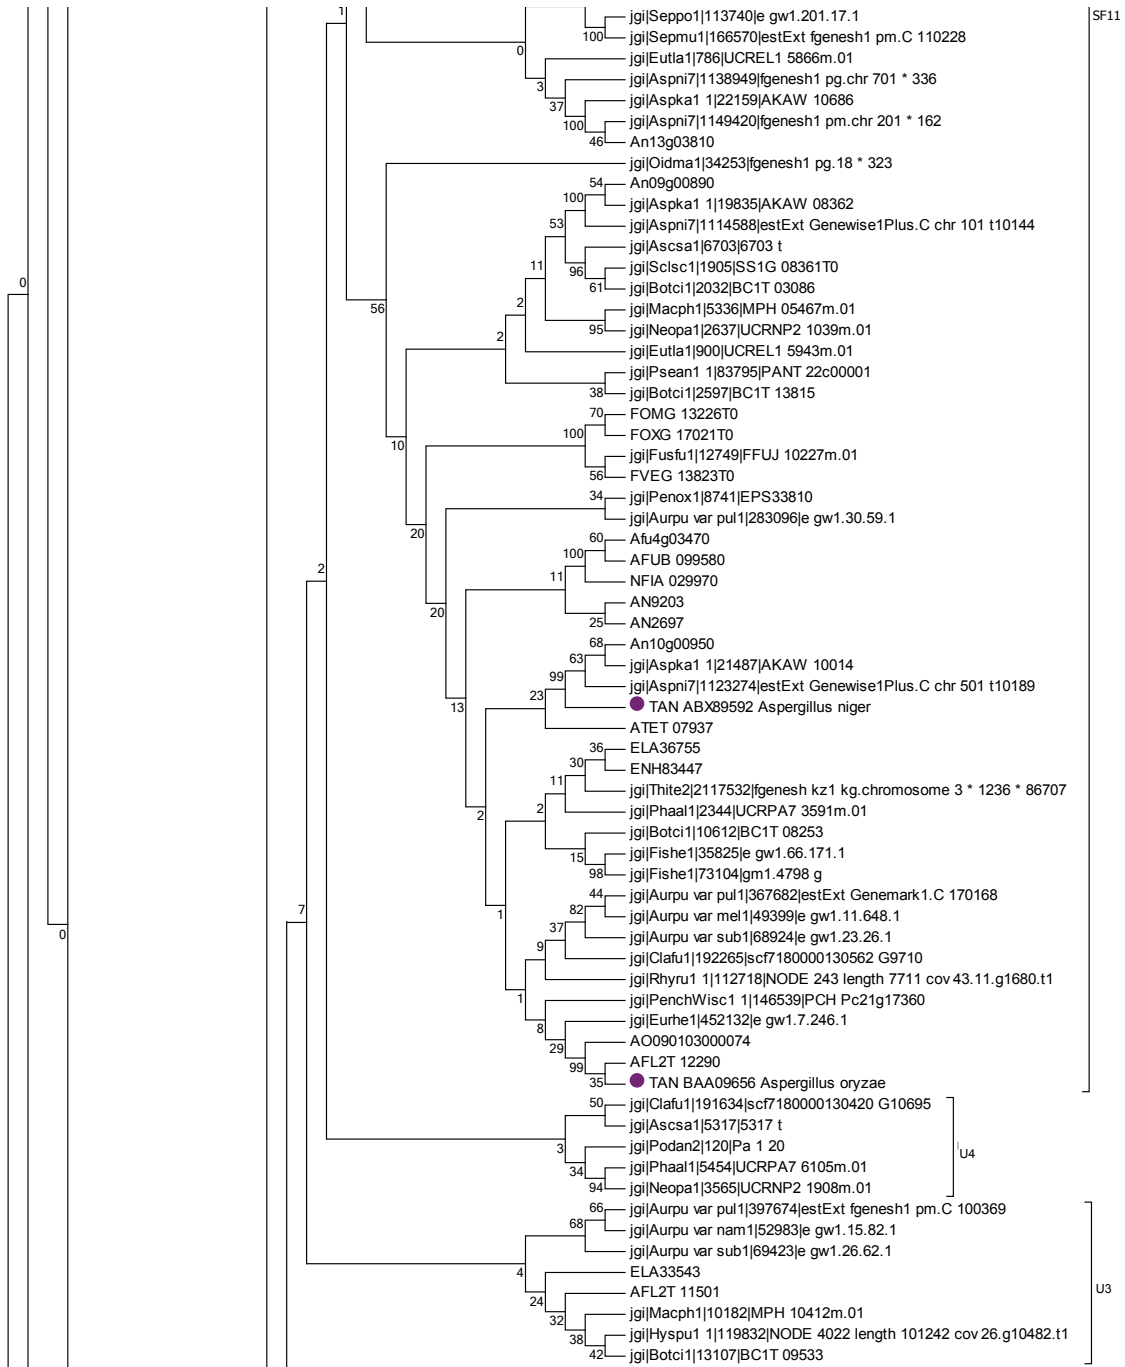

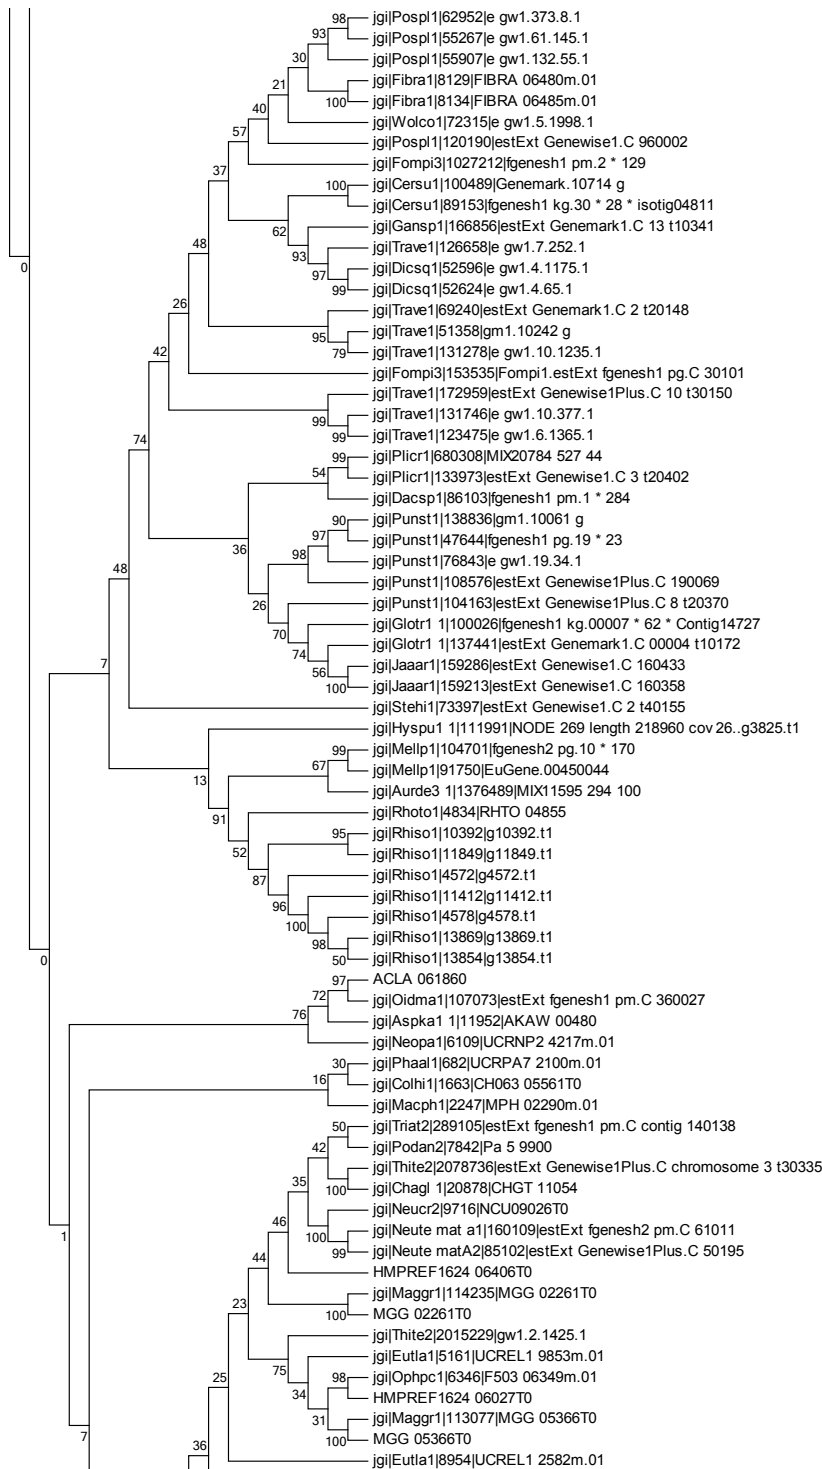

SF9

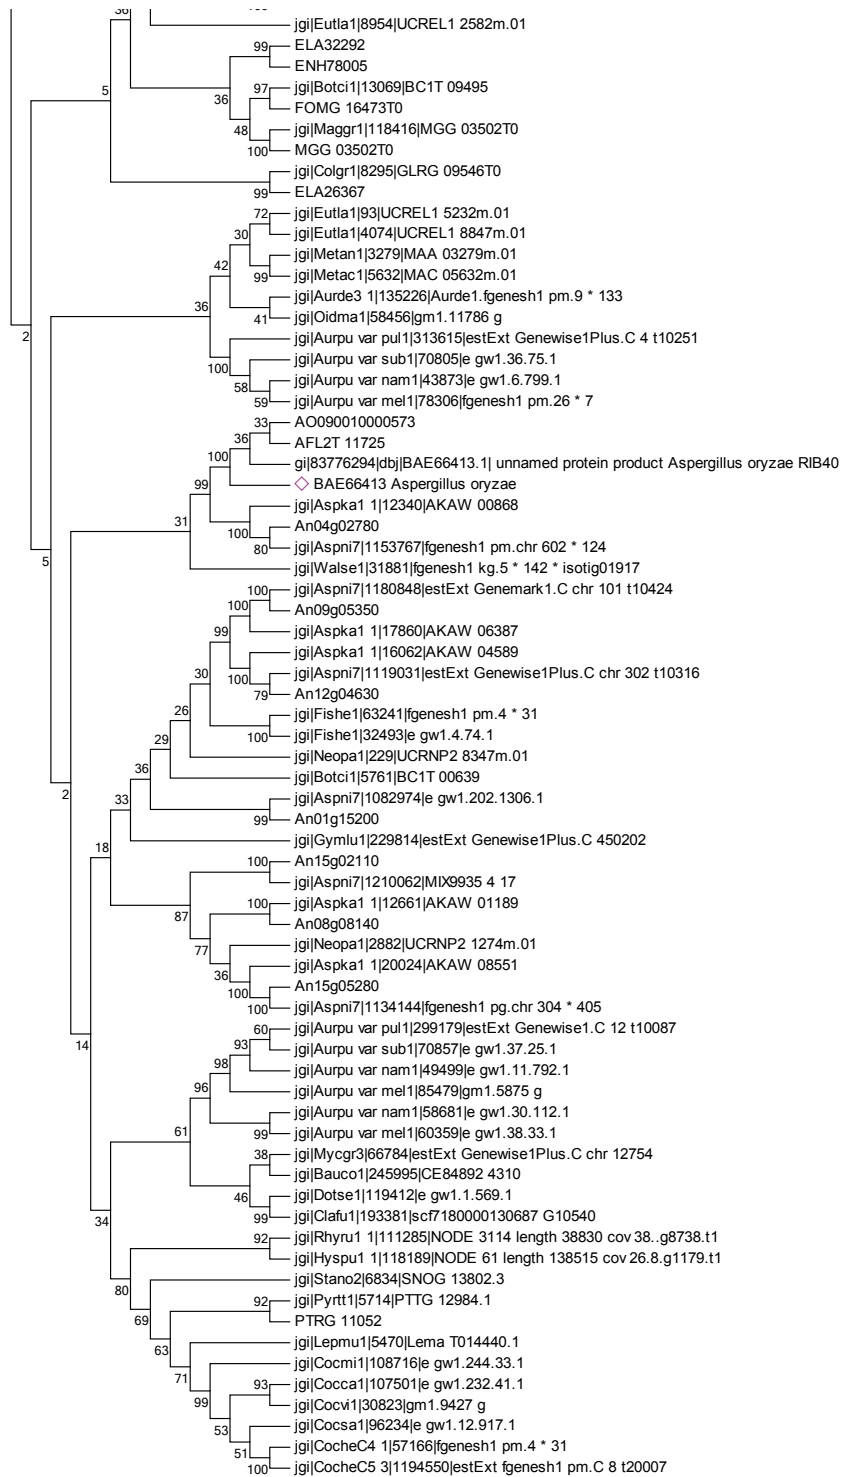

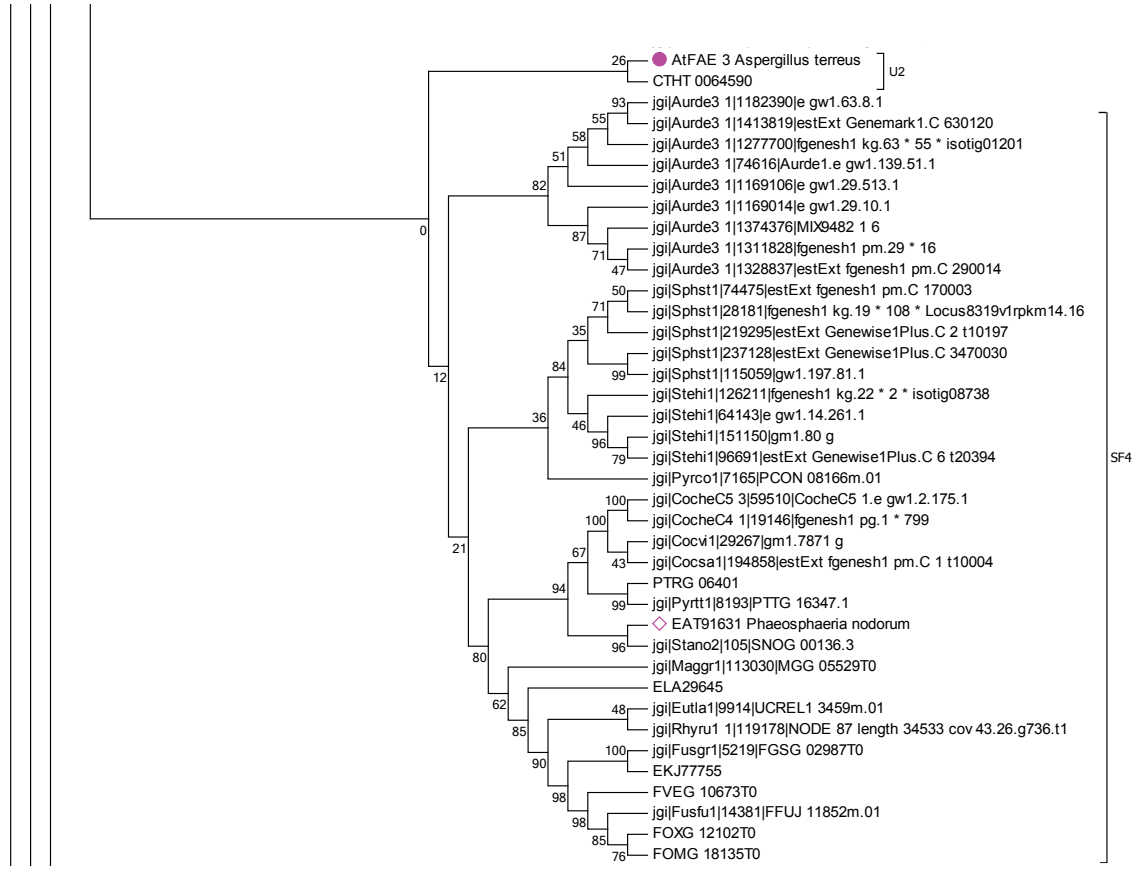

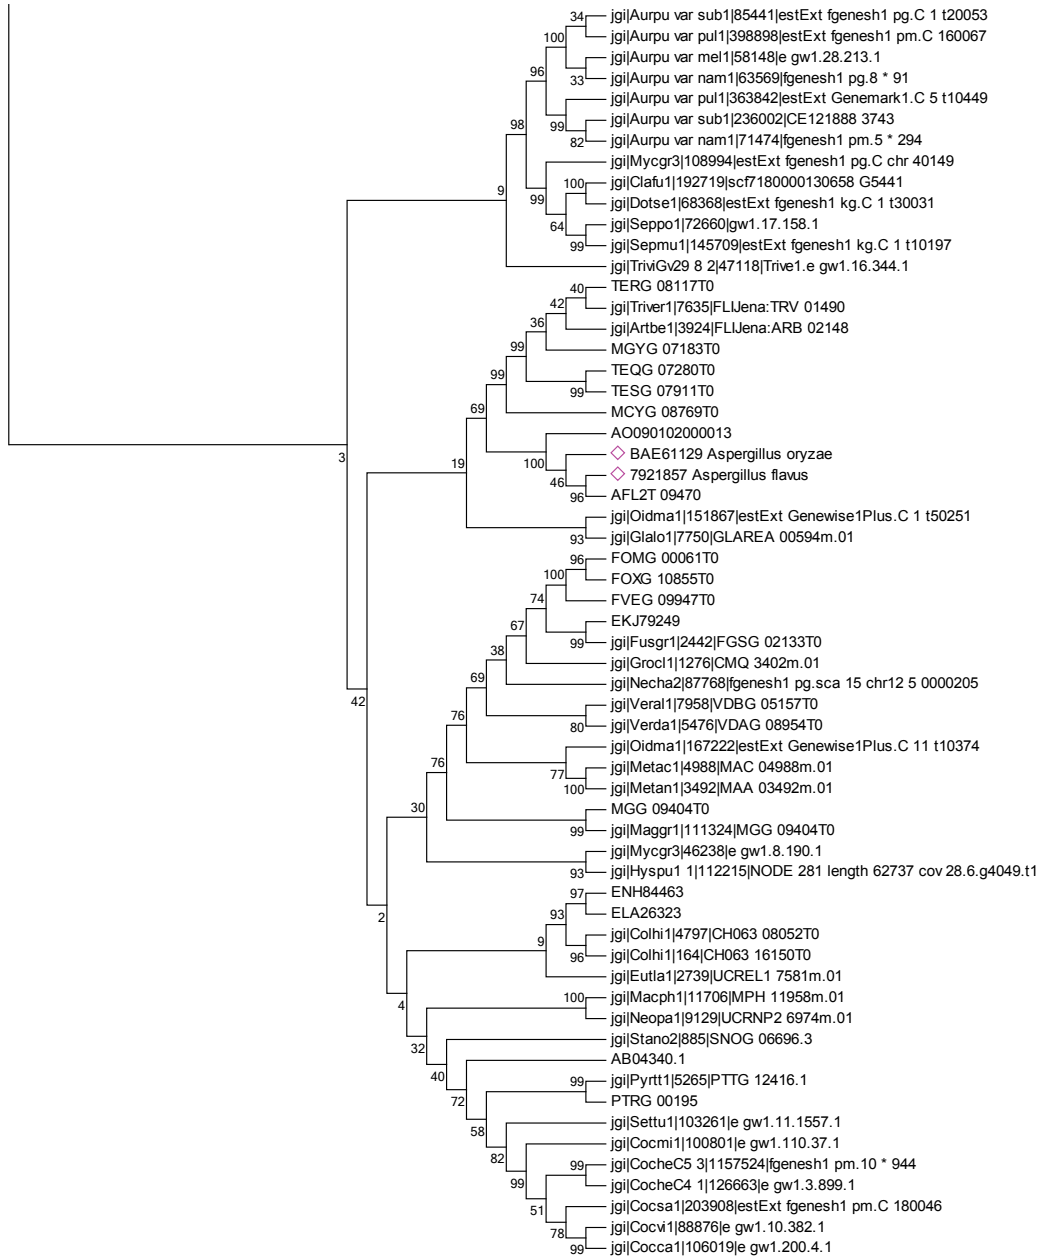

SF3



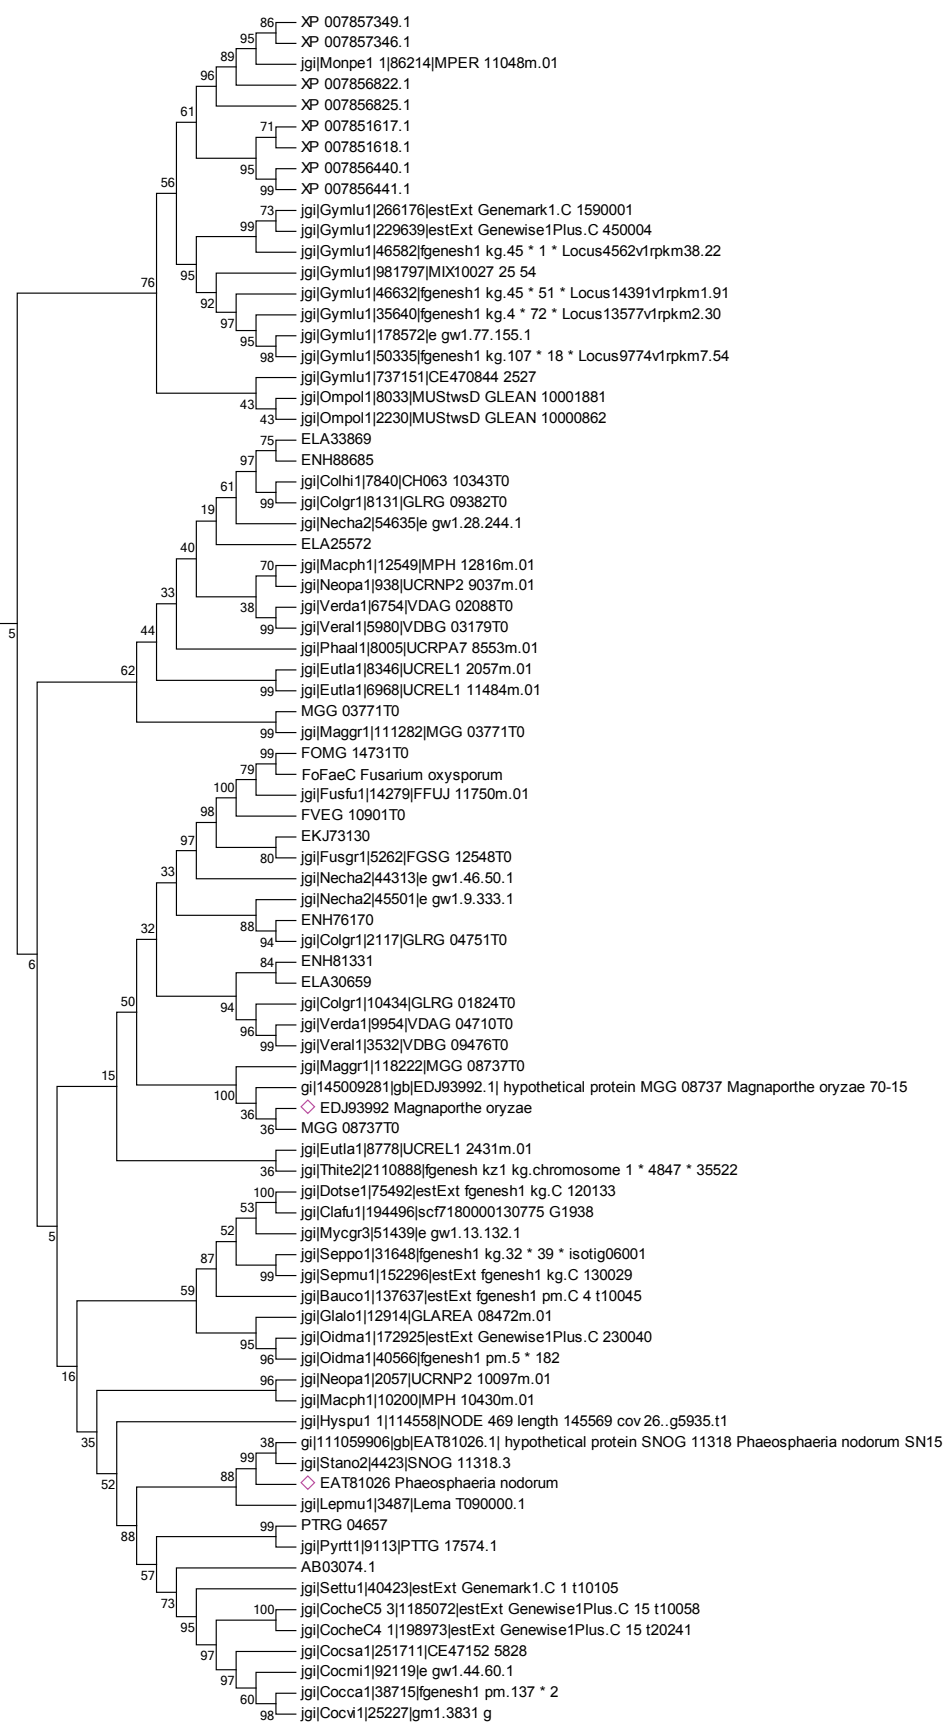

SF2

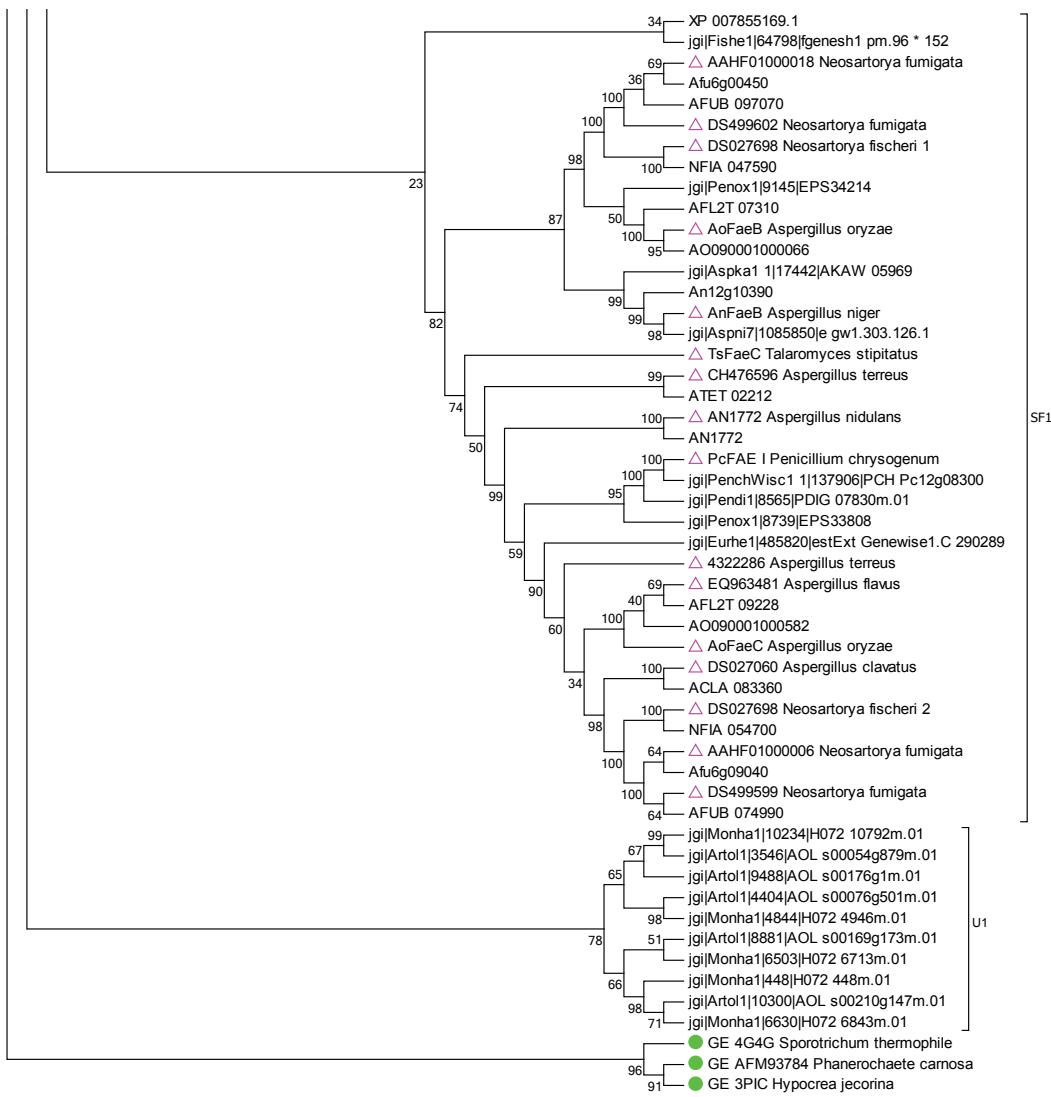

(SF1, U1, Outgroup)
